# Supplementary material for: RNAi-mediated knockdown of the poultry red mite cathepsin D-1 impacts haemoglobin digestion
Source: Parasit Vectors. 2026 Feb 6;19:109. doi: 10.1186/s13071-026-07254-y (PMC12973575; doi:10.1186/s13071-026-07254-y)
Supplement: Supplementary file 1 — Additional file1 (XLSX 20 kb) [file 13071_2026_7254_MOESM1_ESM.xlsx]

## Sheet: Table S1
PCR primers
Gene name	Primer	Primer Sequence (5'-3')	Amplicon
Dg-CatD-1 (Region 1)	Fwd (Ncol)	AATCCATGGCGACGCACAGTAAGTACAATG	357 bp
	Rev (NheI)	AATGCTAGCCTCCCAAGACCAGCTCG
Dg-CatD-1 (Region 2)	Fwd (Ncol)	AATCCATGGGCATCGACCCGAAGCAC	485 bp
	Rev (NheI)	AATGCTAGCTTATGCGGCATCGGCAAA
PCR primers for different length dsRNA
Dg-CatD-1	Fwd (T7 promotor)	TAATACGACTCACTATAGGGAGCTGGTCTTGGGAGGC	N/A
Dg-CatD-1 (500bp)	Rev (T7 promotor)	TAATACGACTCACTATAGGGTTAAGCGGCATCGGCAAAG	500 bp
Dg-CatD-1 (300bp)	Rev (T7 promotor)	TAATACGACTCACTATAGGGCGATTGTAAACTCGATGTTGGG	300 bp
Dg-CatD-1 (200bp)	Rev (T7 promotor)	TAATACGACTCACTATAGGGCGCAACATCCGCGGTG	200 bp
Dg-CatD-1 (150bp)	Rev (T7 promotor)	TAATACGACTCACTATAGGGTGCCCTCACAGCCCTTC	150 bp
Dg-CatD-1 (100bp)	Rev (T7 promotor)	TAATACGACTCACTATAGGGACCTTATCCACTCTGAACTGC	100 bp
Dg-CatD-1 (50bp)	Rev (T7 promotor)	TAATACGACTCACTATAGGGGGTAATGTCGCCCTTGTAGTG	50 bp
Oligonucleotide
Gene name	Strand	Sequence	Amplicon
Dg-CatD-1 (25bp)	Sense 1 (T7 promoter)	GGATCCTAATACGACTCACTATAAGCTGGTCTTGGGAGGCATCGACCC	25 bp
	Sense 2 (T7 promoter )	GGGTCGATGCCTCCCAAGACCAGCTTATAGTGAGTCGTATTAGGATCC
	Antisense 3 (T7 promoter )	GGATCCTAATACGACTCACTATAGGGTCGATGCCTCCCAAGACCAGCT
	Antisense 4 (T7 promoter )	AGCTGGTCTTGGGAGGCATCGACCCTATAGTGAGTCGTATTAGGATCC
RT-qPCR primers
Gene name	Primer	Sequence	Amplicon
Dg-GAPDH-1	Fwd	TTGATGTGGTCGCTGTCAAC	139 bp
	Rev	ATCTTCTTGCCGTTCACCAC
Dg-apoLp-1	Fwd	CTGACAACAAGGGCAGGC	137 bp
	Rev	TGTTGTTGTCGTTGCTGCT
Dg-eEF1a1-1	Fwd	GTCGGTGTCATCAAGTCCG	186 bp
	Rev	AGGGTCGAGAGTGTAGGGT
Dg-CatD-1	Fwd	TGCTCACGCTCGCATGTTAT	209 bp
	Rev	AGCTGGGACACTTGGACGAG
